# Supplementary material for: Chronic Cannabidiol Administration Attenuates Skeletal Muscle De Novo Ceramide Synthesis Pathway and Related Metabolic Effects in a Rat Model of High-Fat Diet-Induced Obesity
Source: PubMed Central journal article supplement (PMC7564398; doi:10.3390/biom10091241), 2020-08-26
Supplement: biomolecules-10-01241-s001.pdf [file biomolecules-10-01241-s001.pdf]

## Supplementary Materials

### Supplementary Figure S1:

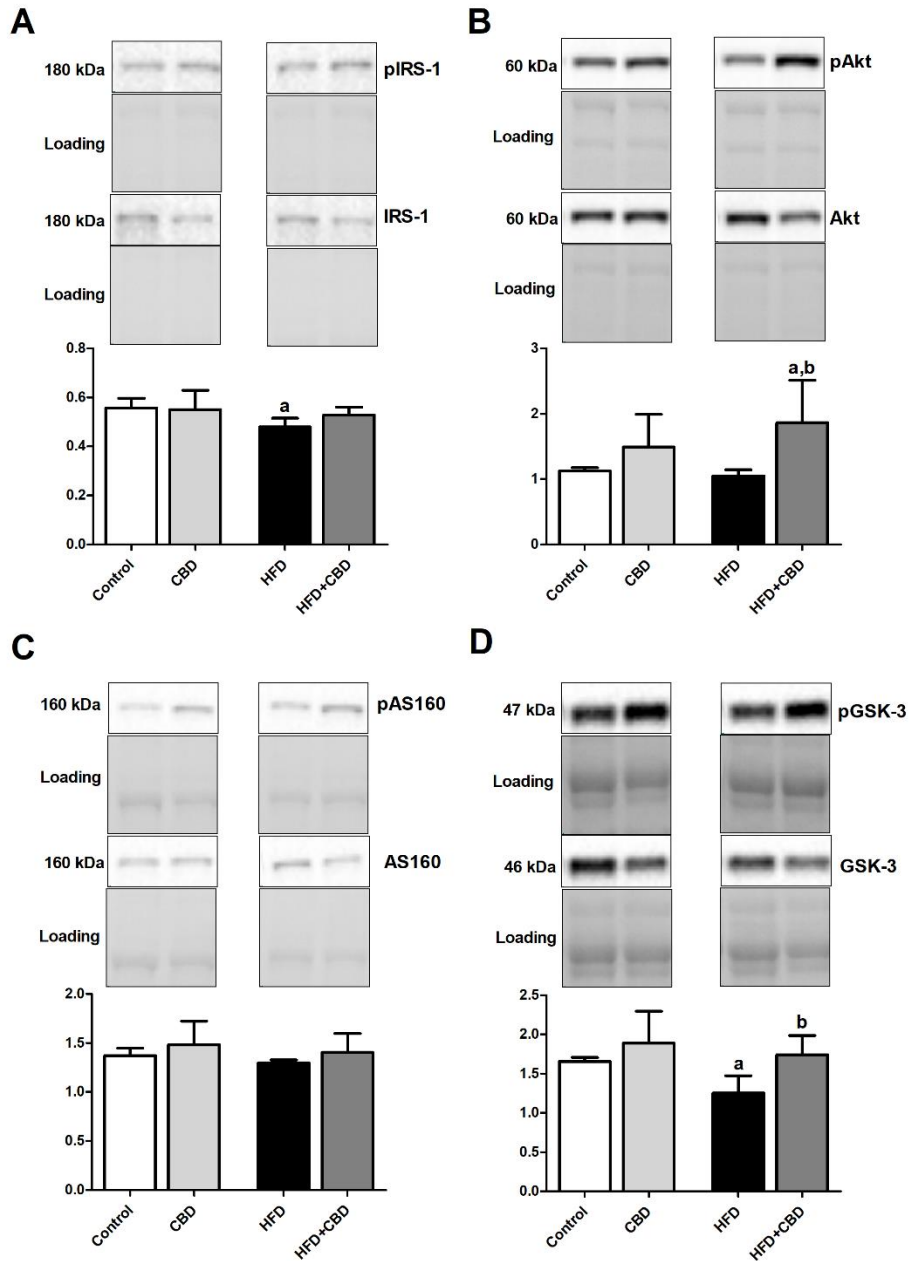

**Figure S1:** Representative Western blots showing the ratio of total expression of phosphorylated and unphosphorylated proteins involved in insulin signaling pathway e.g., (A) phosphorylated insulin receptor substrate 1/insulin receptor substrate 1 (pIRS-1/IRS-1), (B) phosphorylated protein kinase B/protein kinase B (pAkt/Akt), (C) phosphorylated AS160 protein/AS160 protein (pAS160/AS160) and (D) phosphorylated glycogen synthase kinase 3/glycogen synthase kinase 3 (pGSK-3/GSK-3) in the *red gastrocnemius* muscle in control and HFD groups after chronic CBD treatment. The total expressions of the above proteins were presented as a percentage difference compared to the control group, which was set as 100%. The data are expressed as mean values  $\pm$  SD,  $n = 6$  in each group. <sup>a</sup> $p < 0.05$  significant difference: control group vs. examined group; <sup>b</sup> $p < 0.05$  significant difference: HFD vs. HFD+CBD
